# Supplementary material for: Tailoring the activity and selectivity of Rh/SiO2 for the selective hydrogenation of phenol by CoOx promotion
Source: Royal Society of Chemistry journal article supplement (doi:10.1039/d1cy02324a), 2022-01-01
Supplement: d1cy02324a1.pdf [file d1cy02324a1.pdf]

## Supporting Information

### **Tailoring the activity and selectivity of Rh/SiO<sub>2</sub> in the selective hydrogenation of phenol by CoO<sub>x</sub> promotion**

Fei Zhang,<sup>a, c</sup> Chunzheng Wu,<sup>b</sup> Shuibo Wang,<sup>a</sup> Shiwei Wang,<sup>a</sup> Tong Li,<sup>a</sup> Laixi Zou,<sup>c, \*</sup>

Hongbo Yu,<sup>a, \*</sup> and Hongfeng Yin<sup>a, \*</sup>

<sup>a</sup> Ningbo Institute of Materials Technology and Engineering, Chinese Academy of Sciences, 1219 Zhongguan West Road, Ningbo, Zhejiang 315201, P. R. China

<sup>b</sup> Chemistry and Materials Engineering, Zhejiang A&F University, Hangzhou, Zhejiang 311300, P.R. China

<sup>c</sup> School of Metallurgy and Chemical Engineering, Jiangxi University of Science and Technology, Ganzhou, Jiangxi 341000, P.R. China

\* Corresponding author: E-mail: yinhf@nimte.ac.cn; Fax: +86 0574 8668 5043

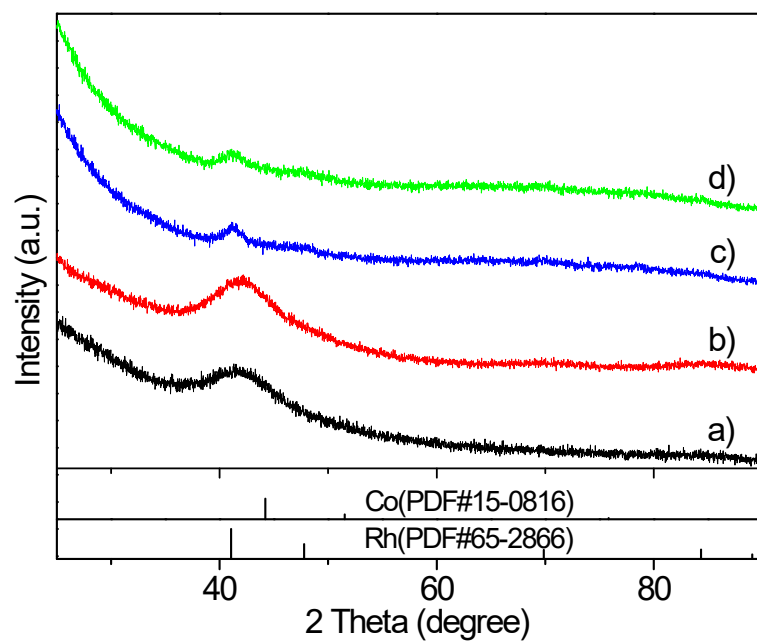

**Fig. S1** XRD patterns showing: a)  $\text{Rh}_1\text{Co}_3$  NPs; b)  $\text{Rh}_1\text{Co}_1$  NPs;  $\text{Rh}_1-(\text{CoO}_x)_3/\text{SiO}_2$  nanocatalysts;  $\text{Rh}_1-(\text{CoO}_x)_1/\text{SiO}_2$  nano catalysts.

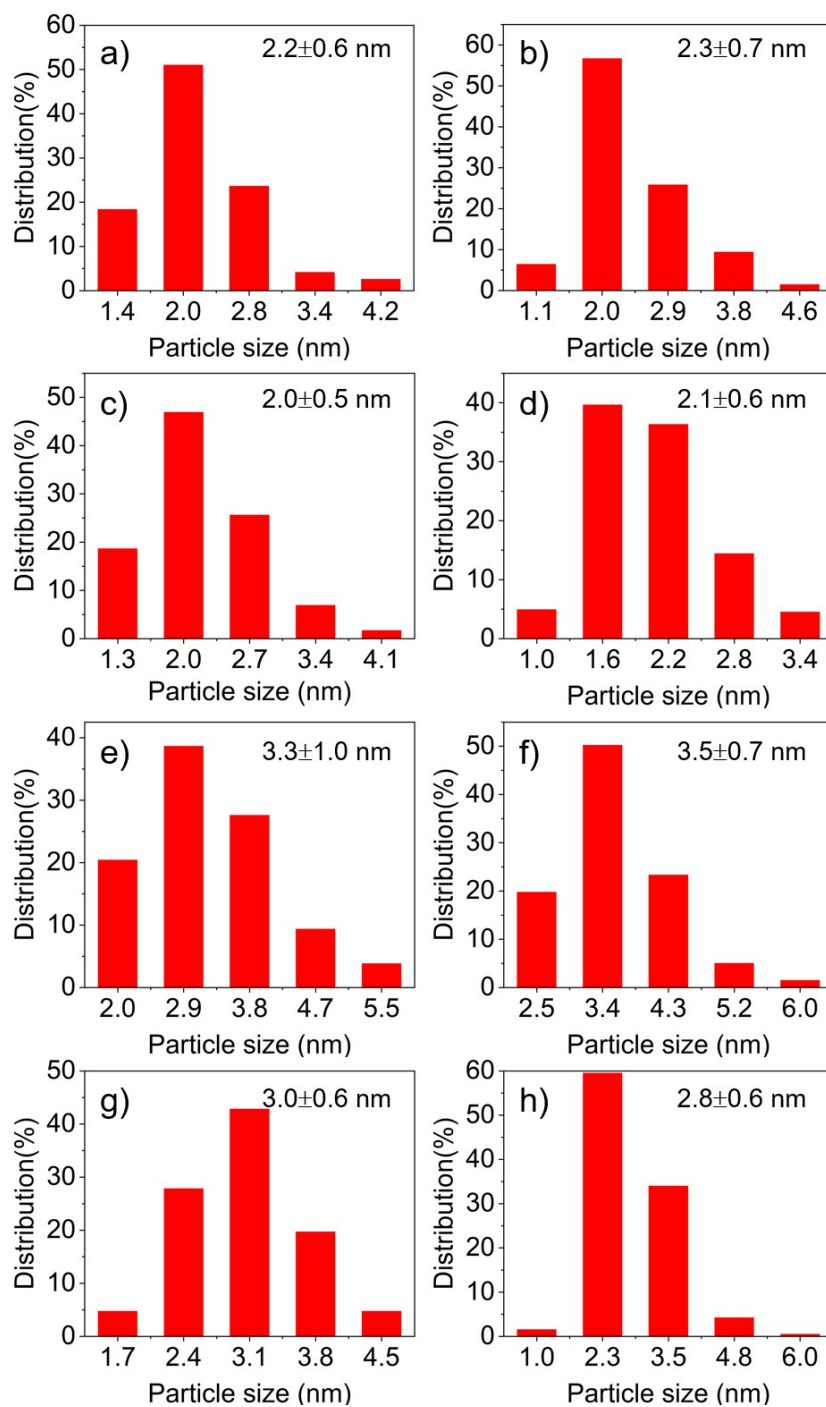

**Fig. S2** Size distributions of as-synthesized nanomaterials showing: a), Rh NPs; b), Rh<sub>3</sub>Co<sub>1</sub> NPs; c), Rh<sub>1</sub>Co<sub>1</sub> NPs; d), Rh<sub>1</sub>Co<sub>3</sub> NPs; e) Rh/SiO<sub>2</sub>; f), Rh<sub>3</sub>-(CoO<sub>x</sub>)<sub>1</sub>/SiO<sub>2</sub>; g), Rh<sub>1</sub>-(CoO<sub>x</sub>)<sub>1</sub>/SiO<sub>2</sub>; and h), Rh<sub>1</sub>-(CoO<sub>x</sub>)<sub>3</sub>/SiO<sub>2</sub>.

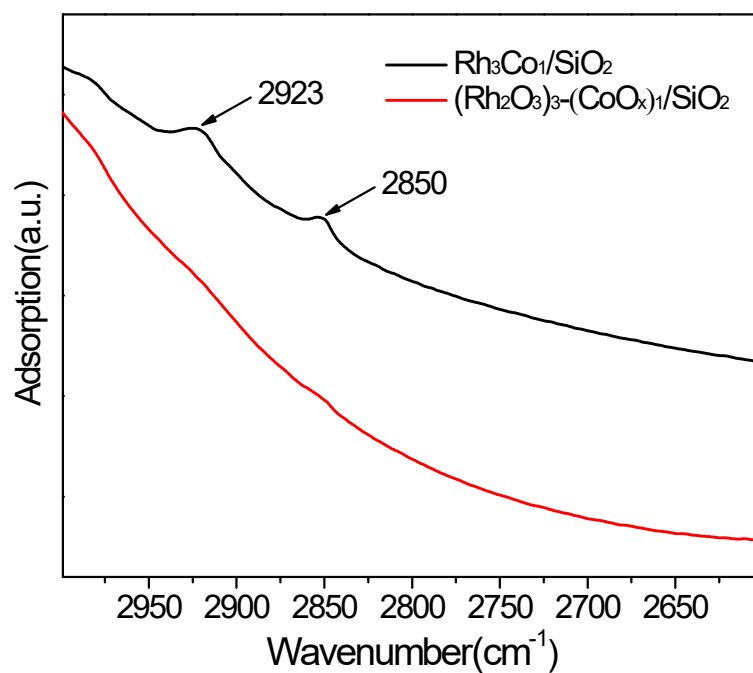

**Fig. S3** FT-IR spectra of Rh<sub>3</sub>Co<sub>1</sub>/SiO<sub>2</sub> sample (without calcination) and (Rh<sub>2</sub>O<sub>3</sub>)<sub>3</sub>-(CoO<sub>x</sub>)<sub>1</sub>/SiO<sub>2</sub> after calcination treatment.

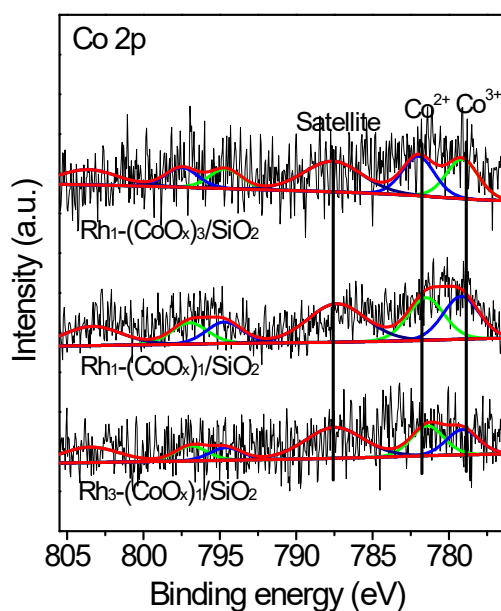

**Figure S4** Co 2p XPS spectra of SiO<sub>2</sub> supported Rh-based nanocatalysts. (Rh loading, theoretical value 1 wt%).

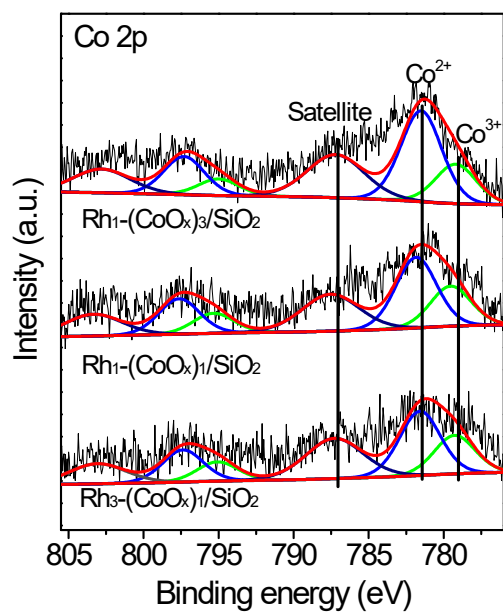

**Figure S5** Co 2p XPS spectra of SiO<sub>2</sub> supported Rh-based nanocatalysts. (Rh loading, theoretical value 3 wt%).

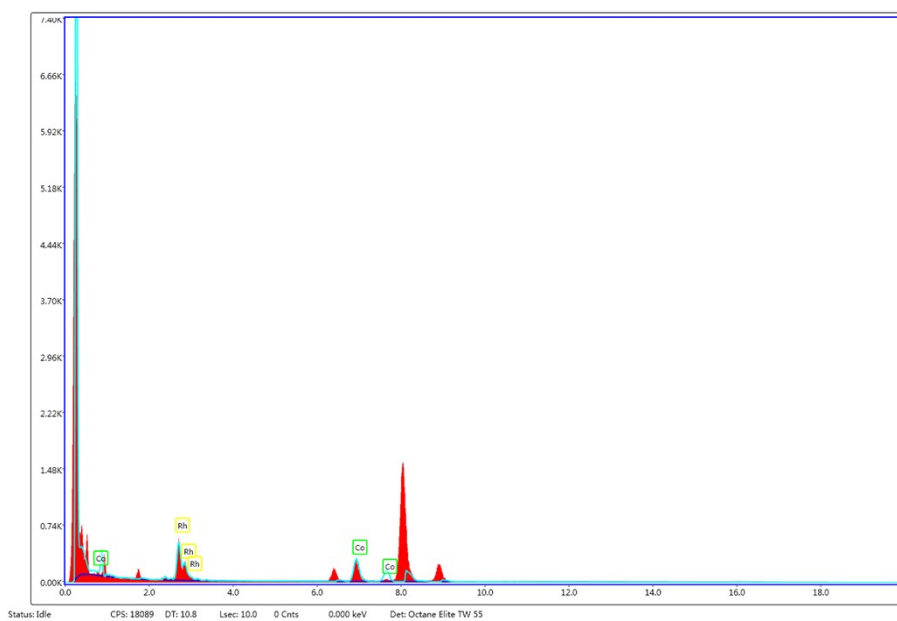

**Fig. S6** EDS spectra of Rh<sub>3</sub>-(CoO<sub>x</sub>)<sub>1</sub>/SiO<sub>2</sub> nano catalyst.

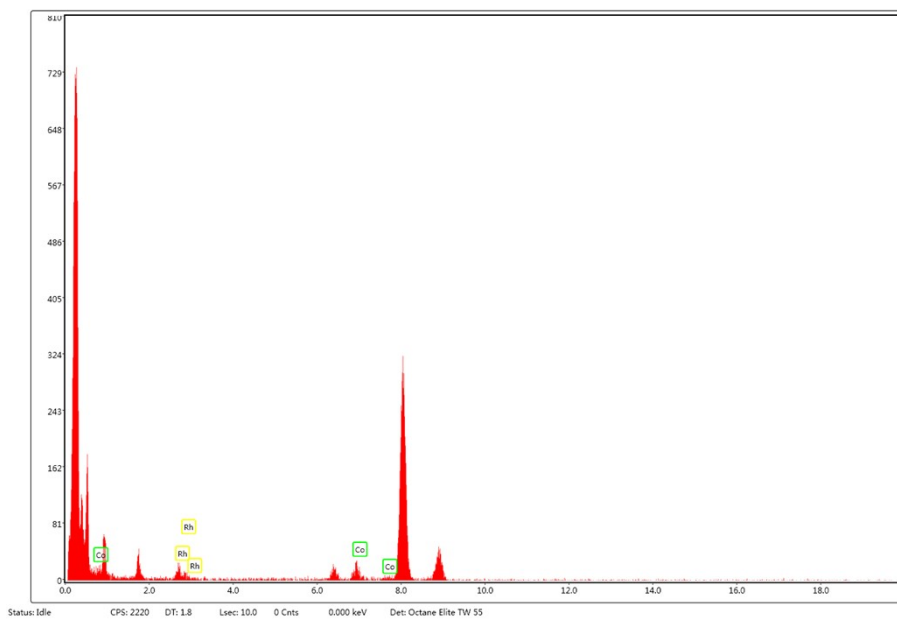

**Fig. S7** EDS spectra of  $\text{Rh}_1-(\text{CoO}_x)_1/\text{SiO}_2$  nano catalyst.

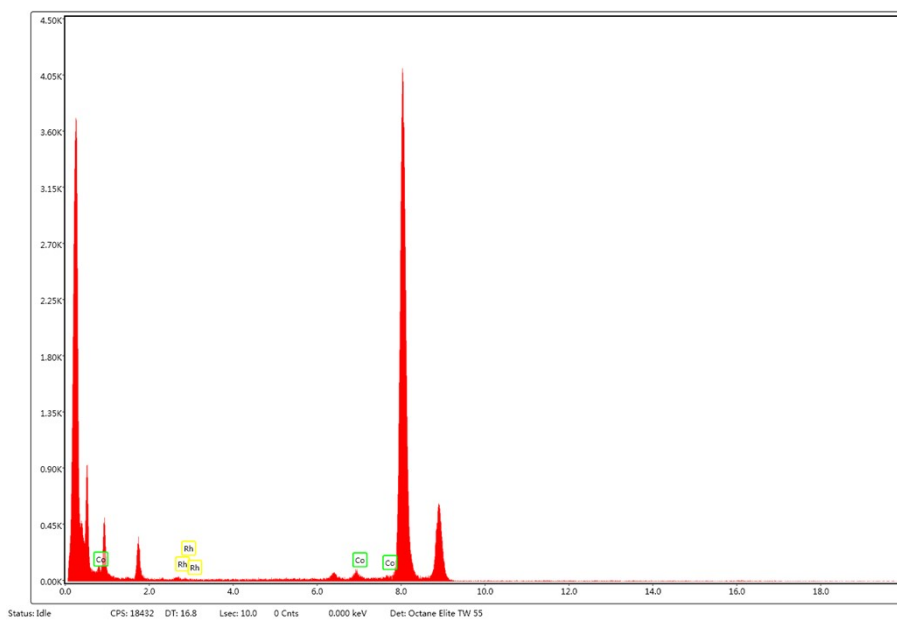

**Fig. S8** EDS spectra of  $\text{Rh}_1-(\text{CoO}_x)_3/\text{SiO}_2$  nano catalyst.

**Table S1.** The actual loadings of Rh and Co in Rh-CoO<sub>x</sub>/SiO<sub>2</sub> catalysts analyzed by ICP-OES.

| Sample                                                              | Rh loading (wt%) | Co loading (wt%) |
|---------------------------------------------------------------------|------------------|------------------|
| Rh/SiO <sub>2</sub>                                                 | 0.99%            | -                |
| Rh <sub>3</sub> -(CoO <sub>x</sub> ) <sub>1</sub> /SiO <sub>2</sub> | 1.02%            | 0.18%            |
| Rh <sub>1</sub> -(CoO <sub>x</sub> ) <sub>1</sub> /SiO <sub>2</sub> | 1.08%            | 0.56%            |
| Rh <sub>1</sub> -(CoO <sub>x</sub> ) <sub>3</sub> /SiO <sub>2</sub> | 1.04%            | 1.65%            |

**Table S2.** The catalytic performance for hydrogenations of phenol over CoO<sub>x</sub>/SiO<sub>2</sub> catalyst.

| Catalyst <sup>a</sup>                       | Conversion (%) | Selectivity (%) |        |
|---------------------------------------------|----------------|-----------------|--------|
|                                             |                | Cyclohexanol    | Others |
| 0.1000 g CoO <sub>x</sub> /SiO <sub>2</sub> | 0              | N/A             | N/A    |

<sup>a</sup>Reaction conditions: phenol, 0.1000 g; temperature, 60 °C; ethanol, 10.0 mL; H<sub>2</sub>, 1.0 MPa; reaction time, 100 min; speed of agitation, 600 rpm/min.

### Synthesis of CoO<sub>x</sub>/SiO<sub>2</sub> catalyst.

The CoO<sub>x</sub>/SiO<sub>2</sub> catalyst was prepared by a wet impregnation method. A certain amount of Co(NO<sub>3</sub>)<sub>2</sub>·6H<sub>2</sub>O aqueous solution was impregnated on 1.0 g of SiO<sub>2</sub> to prepare the 1.0 wt % CoO<sub>x</sub>/SiO<sub>2</sub> catalyst. After 4h of immersion, the sample was dried for 5h at 110 °C, and followed by calcining at 500 °C for 3h in air to obtain CoO<sub>x</sub>/SiO<sub>2</sub> catalyst.

**Table S3.** Comparison of catalytic performance of Rh<sub>3</sub>-(CoO<sub>x</sub>)<sub>1</sub>/SiO<sub>2</sub> and previously reported heterogeneous catalysts for the selective hydrogenation of phenol.

| Catalysts                                                           | Conditions |         |       | Conv. (%) | Sel. (%) | TON <sup>a</sup> /h | Ref.      |
|---------------------------------------------------------------------|------------|---------|-------|-----------|----------|---------------------|-----------|
|                                                                     | T (°C)     | P (MPa) | t (h) |           |          |                     |           |
| Rh <sub>3</sub> -(CoO <sub>x</sub> ) <sub>1</sub> /SiO <sub>2</sub> | 60         | 1.0     | 1.7   | 98.1      | 99.4     | 213                 | This work |
| Rh/SiO <sub>2</sub>                                                 | 25         | 0.1     | 9.0   | 100       | 18       | 18                  | 1         |
| Rh@HMSNs                                                            | 45         | 0.5     | 3.0   | 90.6      | 96.6     | 28                  | 2         |
| Rh/CNF                                                              | 300        | 2.0     | 0.2   | 51        | 40       | 89                  | 3         |
| Rh-PAA                                                              | 80         | 4.0     | 0.5   | 40        | 100      | 40                  | 4         |
| FFSiRh                                                              | 75         | 0.6     | 2.0   | 100       | 52       | 10.                 | 5         |
| Rh@S-MIL-101                                                        | 50         | 0.5     | 2.0   | 80        | 35       | 33                  | 6         |

<sup>a</sup> Turnover number (TON) is measured as moles of products per total molar Rh atoms.

## Reference

- 1 H. W. Zhang, A. J. Han, K. Okumura, L. X. Zhong, S. Z. Li, S. Jaenicke, G. K. Chuah, *J. Catal.*, 2018, **364**, 354-365.
- 2 P. J. Yan, P. F. Tian, K. J. Li, M. A. C. Stuart, J. Y Wang, X. H. Yu S. H. Zhou, *Chem. Eng. J.*, 2020, **397**, 125484-125495.
- 3 H. J. Wang, F. Y. Zhao, S. Fujita, M. Arai, *Catal. Commun.*, 2008, **9**, 362-368.
- 4 S. Kuklin, A. Maximov, A. Zolotukhina, E. Karakhanov, *Catal. Commun.*, 2016, **73**, 63-68.
- 5 L. L. R. Vono, C. Broicher, Karine Philippot, L. M. Rossi, *Catal. Today.*, 2021, **381**, 126-132.
- 6 I. E. Ertas, M. Gulcan, A. Bulut, M. Yurderi, M. Zahmakiran, *J. Mol. Catal. A: Chem.*, 2015, **410**, 209-220.
